# Supplementary material for: Asymptomatic norovirus infection associated with swimming at a tropical beach: A prospective cohort study
Source: PubMed Central journal article supplement (PMC5874074; doi:10.1371/journal.pone.0195056), 2018-03-28
Supplement: pone.0195056.s001.pdf [file pone.0195056.s001.pdf]

## Probability of norovirus immunoconversion<sup>a</sup> among head immersion swimmers

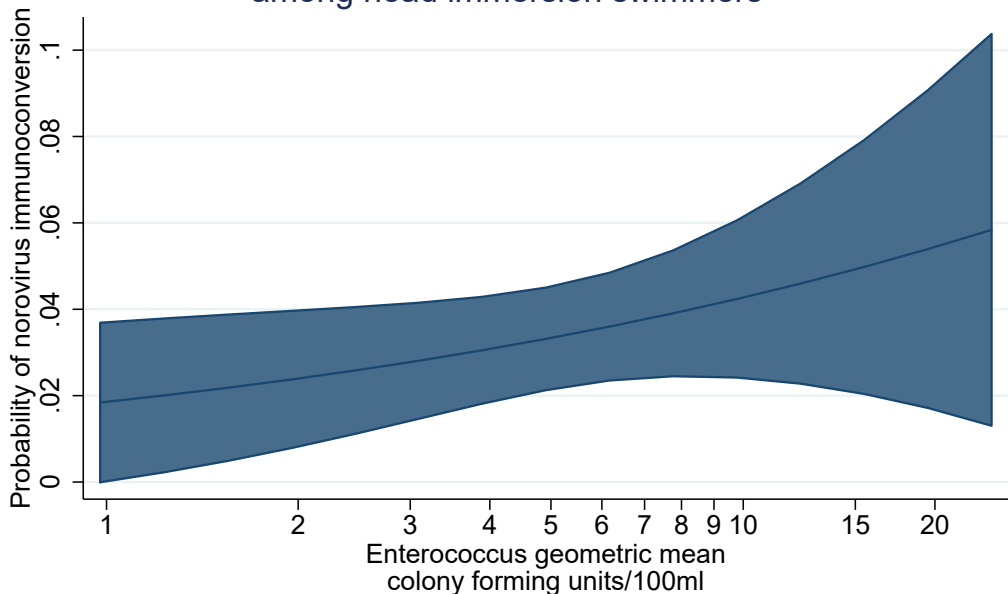

<sup>a</sup> Adjusted probabilities and 95% confidence limit estimated from logistic regression model  
Odds ratio=2.43 (p=0.17)
